# Supplementary material for: Nationwide trends in the epidemiology of diabetic foot complications and lower-extremity amputation over an 8-year period
Source: PubMed Central journal article supplement — BMJ Open Diabetes Res Care. 2019 Oct 11;7(1):e000795. doi: 10.1136/bmjdrc-2019-000795 (PMC6827817; doi:10.1136/bmjdrc-2019-000795), 2019-10-11
Supplement: bmjdrc-2019-000795supp001.pdf [file bmjdrc-2019-000795supp001.pdf]

**Appendix 1— Brief summary of related procedure payment codes of NHIRD**

| Code   | Procedure item                                          | Code   | Procedure item                                                               |
|--------|---------------------------------------------------------|--------|------------------------------------------------------------------------------|
| 33066B | Tomography (each)                                       | 68048B | Percutaneous transluminal septal myocardial ablation                         |
| 33070B | computered tomography (C. T.)-without contrast          | 68049B | Thoracoscopic Pericardial Window                                             |
| 33071B | computered tomography ( C. T.)-with contrast            | 68050B | Arrhythmia surgery via atriotomy                                             |
| 33072B | computered tomography ( C. T.)- with/without contrast   | 68051B | Ventricular Assist System implantation                                       |
| 33073B | Pulmonary angiography                                   | 68052B | Cardiopulmonary bypass                                                       |
| 33074B | P.T.A. (percutaneous transluminal angioplasty): simple  | 69001B | Embolectomy,arterial                                                         |
| 33075B | T.A.E.(trans-arterial embolization)                     | 69002B | Embolectomy,arterial catheter                                                |
| 33076B | Percutaneous coronary dilatation-one vessel             | 69003B | Thrombectomy, venous                                                         |
| 33103B | CT Guide biopsy                                         | 69004B | Arterial endarterectomy with or without bypass graft                         |
| 33104B | Direct pulmonary venography                             | 69005B | Exploration, vascular                                                        |
| 33092B | Fluoroscopic reduction of intussusception               | 69019B | Stripping, subfascial, radical as Linton type with or without skin graft     |
| 33093B | Bilateral reno-venous sampling                          | 69020B | Ligation and division of short saphenous vein at sapheno- popliteal junction |
| 33095B | Revision of percutaneous nephrostomy tube(Pigtail)      | 69021C | Suture, ligation or stripping of minor varicose vein                         |
| 33096B | Swallowing video fluorography                           | 69022B | Embolectomy, pulmonary artery                                                |
| 33097B | IV-DSA                                                  | 69023B | Excision and graft bypass or direct repair of A-V fistula, neck or extremity |
| 33113B | Transjugular intrahepatic portosystemic shunt           | 69035B | Bental procedure                                                             |
| 33114B | Transcatheterclosureofpatentductusarteriosus>=2.5mm     | 70405B | Repair of diaphragmatic hernia trans-abdominal                               |
| 33115B | P.T.A. (percutaneous transluminal angioplasty): complex | 69036B | Excision and graft bypass or direct repair A-V fistula of chest or abdomen   |

Please check the link below: <https://data.gov.tw/dataset/9405> for complete coding book (in Chinese characters).
